# Supplementary material for: Impacts of tropical cyclones on the thermodynamic conditions in the tropical tropopause layer observed by A-train satellites
Source: Copernicus journal article supplement (doi:10.5194/acp-2021-154), 2021-04-23
Supplement: Supplementary file [file acp-2021-154-AC2-supplement.pdf]

## Response to Review Comment 2, acp-2021-154

This is a very thorough study of a relevant topic, with a number of interesting results. The analysis is careful and detailed, and the manuscript is well organized and well written. For these reasons I recommend publication with minor comments.

**Thank you for your positive comments on this manuscript. Following your suggestions, we rewrote the abstract and greatly expanded the Section 2 to briefly describe the synergistic retrieval and A-Train instruments used in this study.**

Here are those minor comments:

The use of CIWV to represent water vapor amount above a certain layer is non-standard and thus a bit confusing. 'Column integrated' implies total in the entire column; a web search shows many examples of this usage: <https://www.google.com/search?client=firefox-b-1-d&q=column+integrated+water+vapor>. One suggestion is to use "Layer Integrated Water Vapor", whose meaning should be immediately apparent.

**Done. Thank you for pointing it out.**

A few more details on the analysis are needed in the Abstract. Please explicitly mention the A-Train instruments used and what quantities are examined. Also, please expand briefly on the synergistic retrieval. What specific instruments does it use? A sentence or two should suffice. Also, how are cooling rates estimated. Again, a sentence or two will suffice.

**Following this suggestion, we rewrote the abstract and added necessary descriptions to instruments and methods.**

Finally, change 'convections' to 'convection'.

**Done.**

Line 118. Please state which two (or more?) AIRS L1B frequencies are used to estimate brightness temperature.

**Done.**

Include the OT, NOT, etc. definitions in figure 2 caption. Otherwise, terms for quantities in the figure cannot be fully understood without knowing where in the text the figure is discussed.

**We have re-order the figures and corresponding texts so that the schematic plot and the definition show up earlier.**

Line 339. Change 'cools' to 'cool'.

**Rephrased.**

Line 463. Change "under overcast cloud conditions" to "for overcast cloud conditions" or something similar. Please don't use "under" because it implies beneath the clouds.

**Done.**
